# Supplementary material
Source: PubMed Central journal article supplement (PMC4695304)
Supplement: NIHMS744943-supplement-Suppl.pdf [file NIHMS744943-supplement-Suppl.pdf]

Table S1. Adjusted<sup>1</sup> odds ratios (ORs) and 95% confidence intervals for the association of glaucoma subtypes with myopia and hyperopia categories, Kaiser Permanente Northern California, 2008-2014.

|                                 | PACG        |                     | PEX         |                     | POAG        |                     | NTG         |                     | PIGM        |                     | OHTN        |                     |
|---------------------------------|-------------|---------------------|-------------|---------------------|-------------|---------------------|-------------|---------------------|-------------|---------------------|-------------|---------------------|
|                                 | OR          | 95% CI              |
| <b>OD Spherical Equivalent</b>  |             |                     |             |                     |             |                     |             |                     |             |                     |             |                     |
| High myopia <sup>2,8</sup>      |             |                     | <b>2.26</b> | <b>(1.38, 3.70)</b> | <b>2.24</b> | <b>(2.06, 2.44)</b> | <b>3.88</b> | <b>(3.24,4.64)</b>  | <b>5.04</b> | <b>(3.72, 6.83)</b> | <b>1.54</b> | <b>(1.42, 1.67)</b> |
| Moderate myopia <sup>3</sup>    | <b>0.43</b> | <b>(0.34, 0.55)</b> | 1.15        | (0.79, 1.67)        | <b>1.67</b> | <b>(1.57, 1.77)</b> | <b>2.17</b> | <b>(1.73, 2.72)</b> | <b>4.02</b> | <b>(3.16, 5.12)</b> | <b>1.35</b> | <b>(1.28, 1.42)</b> |
| Low myopia <sup>4</sup>         | <b>0.71</b> | <b>(0.61, 0.83)</b> | 1.30        | (0.99, 1.71)        | <b>1.28</b> | <b>(1.22, 1.35)</b> | <b>1.43</b> | <b>(1.24, 1.65)</b> | <b>2.01</b> | <b>(1.60, 2.53)</b> | <b>1.28</b> | <b>(1.22, 1.34)</b> |
| Emmetropia <sup>5</sup>         | 1.00        | ---                 | 1.00        | ---                 | 1.00        | ---                 | 1.00        | ---                 | 1.00        | ---                 | 1.00        | ---                 |
| Mild hyperopia <sup>6</sup>     | <b>1.58</b> | <b>(1.43, 1.75)</b> | 1.03        | (0.82, 1.28)        | <b>0.89</b> | <b>(0.85, 0.94)</b> | 0.89        | (0.78, 1.02)        | <b>0.59</b> | <b>(0.44, 0.78)</b> | 1.02        | (0.98, 1.07)        |
| Severe hyperopia <sup>7,8</sup> | <b>3.33</b> | <b>(2.92, 3.80)</b> | 0.83        | (0.57, 1.21)        | <b>0.70</b> | <b>(0.64, 0.78)</b> | <b>0.43</b> | <b>(0.30, 0.61)</b> | 0.68        | (0.40, 1.16)        | 0.92        | (0.85, 1.00)        |
| p-value for trend               |             | <b>P&lt;0.0001</b>  |             | <b>P&lt;0.001</b>   |             | <b>P&lt;0.0001</b>  |             | <b>P&lt;0.0001</b>  |             | <b>P&lt;0.0001</b>  |             | <b>P&lt;0.0001</b>  |

Abbreviations: primary angle-closure glaucoma (PACG), pseudoexfoliation glaucoma (PEX), primary open angle glaucoma (POAG), normal tension glaucoma (NTG), pigmentary glaucoma (PIGM), and ocular hypertension (OHTN).

<sup>1</sup> Adjusted for age at the first recorded spherical equivalent measure, sex, and race/ethnicity.

<sup>2</sup> Indicates SE  $\leq$  -6.00 D.

<sup>3</sup> Indicates SE of -5.99 to -3.00 D.

<sup>4</sup> Indicates SE of -2.99 to -1.00 D.

<sup>5</sup> Indicates SE of -0.99 to 1.00 D.

<sup>6</sup> Indicates SE of 1.01 to 3.00 D.

<sup>7</sup> Indicates SE  $\geq 3.01$  D.

<sup>8</sup> Estimates not provided for  $\leq -6.00$  for PCAG and  $\geq 3.01$  for PEX due to small numbers of subjects.

Table S2. Adjusted<sup>1</sup> odds ratios (ORs) and 95% confidence intervals for the association of glaucoma subtypes with myopia and hyperopia categories, < 65 years of age at refractive error measurements, Kaiser Permanente Northern California, 2008-2014.

| OD Spherical<br>Equivalent      | PACG        |                     | PEX  |                   | POAG        |                     | NTG         |                     | PIGM        |                     | OHTN        |                     |
|---------------------------------|-------------|---------------------|------|-------------------|-------------|---------------------|-------------|---------------------|-------------|---------------------|-------------|---------------------|
|                                 | OR          | 95% CI              | OR   | 95% CI            | OR          | 95% CI              | OR          | 95% CI              | OR          | 95% CI              | OR          | 95% CI              |
| High myopia <sup>2,8</sup>      |             |                     | 1.66 | (0.48, 5.66)      | <b>2.37</b> | <b>(2.12, 2.64)</b> | <b>4.49</b> | <b>(3.52, 5.74)</b> | <b>5.29</b> | <b>(3.68, 7.61)</b> | <b>1.63</b> | <b>(1.48, 1.80)</b> |
| Moderate myopia <sup>3</sup>    | <b>0.40</b> | <b>(0.27, 0.59)</b> | 1.38 | (0.57, 3.03)      | <b>1.62</b> | <b>(1.49, 1.77)</b> | <b>2.57</b> | <b>(2.06, 3.22)</b> | <b>3.65</b> | <b>(2.71, 4.92)</b> | <b>1.45</b> | <b>(1.35, 1.56)</b> |
| Low myopia <sup>4</sup>         | <b>0.59</b> | <b>(0.44, 0.77)</b> | 1.37 | (0.66, 2.85)      | <b>1.24</b> | <b>(1.15, 1.35)</b> | <b>1.35</b> | <b>(1.06, 1.70)</b> | <b>2.08</b> | <b>(1.55, 2.80)</b> | <b>1.39</b> | <b>(1.31, 1.48)</b> |
| Emmetropia <sup>5</sup>         | 1.00        | ---                 | 1.00 | ---               | 1.00        | ---                 | 1.00        | ---                 | 1.00        | ---                 | 1.00        | ---                 |
| Mild hyperopia <sup>6</sup>     | <b>2.82</b> | <b>(2.36, 3.36)</b> | 1.01 | (0.47, 2.15)      | <b>0.86</b> | <b>(0.79, 0.94)</b> | 0.95        | (0.73, 1.22)        | <b>0.46</b> | <b>(0.28, 0.75)</b> | 1.05        | (0.98, 1.12)        |
| Severe hyperopia <sup>7,8</sup> | <b>7.74</b> | <b>(6.11, 9.79)</b> | 0.70 | (0.09, 5.23)      | <b>0.74</b> | <b>(0.59, 0.93)</b> | 0.54        | (0.24, 1.23)        | 0.86        | (0.35, 2.13)        | 0.91        | (0.77, 1.07)        |
| Per Diopter Decrease            | <b>0.70</b> | <b>(0.68, 0.72)</b> | 1.08 | (0.98, 1.19)      | <b>1.11</b> | <b>(1.10, 1.12)</b> | <b>1.17</b> | <b>(1.15, 1.20)</b> | <b>1.22</b> | <b>(1.18, 1.25)</b> | <b>1.06</b> | <b>(1.05, 1.07)</b> |
| p-value for trend               |             | <b>P&lt;0.0001</b>  |      | <b>P&lt;0.001</b> |             | <b>P&lt;0.0001</b>  |             | <b>P&lt;0.0001</b>  |             | <b>P&lt;0.0001</b>  |             | <b>P&lt;0.0001</b>  |

Abbreviations: primary angle-closure glaucoma (PACG), pseudoexfoliation glaucoma (PEX), primary open angle glaucoma (POAG), normal tension glaucoma (NTG), pigmentary glaucoma (PIGM), and ocular hypertension (OHTN).

<sup>1</sup> Adjusted for age at the first recorded spherical equivalent measure, sex and race/ethnicity.

<sup>2</sup> Indicates SE  $\leq$  -6.00 D.

<sup>3</sup> Indicates SE of -5.99 to -3.00 D.

<sup>4</sup> Indicates SE of -2.99 to -1.00 D.

<sup>5</sup> Indicates SE of -0.99 to 1.00 D.

<sup>6</sup> Indicates SE of 1.01 to 3.00 D.

<sup>7</sup> Indicates SE  $\geq 3.01$  D.

<sup>8</sup> Estimates not provided for  $\leq -6.00$  for PCAG and  $\geq 3.01$  for PEX due to small numbers of subjects.

Table S3. Adjusted<sup>1</sup> odds ratios (ORs) and 95% confidence intervals for the association of glaucoma subtypes with myopia and hyperopia categories,  $\geq 65$  years of age at refractive error measurements, Kaiser Permanente Northern California, 2008-2014.

| OD Spherical<br>Equivalent      | PACG        |                     | PEX         |                     | POAG        |                     | NTG         |                     | PIGM        |                     | OHTN        |                     |
|---------------------------------|-------------|---------------------|-------------|---------------------|-------------|---------------------|-------------|---------------------|-------------|---------------------|-------------|---------------------|
|                                 | OR          | 95% CI              |
| High myopia <sup>2,8</sup>      |             |                     | <b>2.55</b> | <b>(1.48, 4.38)</b> | <b>2.01</b> | <b>(1.75, 2.32)</b> | <b>3.28</b> | <b>(2.48, 4.33)</b> | <b>4.12</b> | <b>(2.30, 7.35)</b> | <b>1.43</b> | <b>(1.23, 1.66)</b> |
| Moderate myopia <sup>3</sup>    | <b>0.48</b> | <b>(0.36, 0.66)</b> | 1.27        | (0.82, 1.95)        | <b>1.69</b> | <b>(1.56, 1.85)</b> | <b>1.95</b> | <b>(1.58, 2.41)</b> | <b>4.03</b> | <b>(2.81, 5.77)</b> | <b>1.19</b> | <b>(1.09, 1.30)</b> |
| Low myopia <sup>4</sup>         | <b>0.81</b> | <b>(0.67, 0.98)</b> | 1.30        | (0.97, 1.74)        | <b>1.32</b> | <b>(1.23, 1.42)</b> | <b>1.50</b> | <b>(1.25, 1.80)</b> | <b>1.89</b> | <b>(1.31, 2.71)</b> | <b>1.14</b> | <b>(1.06, 1.22)</b> |
| Emmetropia <sup>5</sup>         | 1.00        | ---                 | 1.00        | ---                 | 1.00        | ---                 | 1.00        | ---                 | 1.00        | ---                 | 1.00        | ---                 |
| Mild hyperopia <sup>6</sup>     | <b>1.13</b> | <b>(1.00, 1.28)</b> | 1.01        | (0.80, 1.27)        | <b>0.88</b> | <b>(0.83, 0.94)</b> | <b>0.83</b> | <b>(0.71, 0.97)</b> | <b>0.64</b> | <b>(0.44, 0.92)</b> | 0.96        | (0.91, 1.01)        |
| Severe hyperopia <sup>7,8</sup> | <b>2.34</b> | <b>(2.00, 2.72)</b> | 0.82        | (0.56, 1.20)        | <b>0.70</b> | <b>(0.63, 0.78)</b> | <b>0.40</b> | <b>(0.27, 0.59)</b> |             |                     | 0.91        | (0.83, 1.00)        |
| Per Diopter Decrease            | <b>0.85</b> | <b>(0.83, 0.87)</b> | <b>1.06</b> | <b>(1.02, 1.11)</b> | <b>1.10</b> | <b>(1.09, 1.11)</b> | <b>1.15</b> | <b>(1.13, 1.18)</b> | <b>1.23</b> | <b>(1.18, 1.27)</b> | <b>1.04</b> | <b>(1.03, 1.05)</b> |
| p-value for trend               |             | <b>P&lt;0.0001</b>  |             | <b>P&lt;0.001</b>   |             | <b>P&lt;0.0001</b>  |             | <b>P&lt;0.0001</b>  |             | <b>P&lt;0.0001</b>  |             | <b>P&lt;0.0001</b>  |

Abbreviations: primary angle-closure glaucoma (PACG), pseudoexfoliation glaucoma (PEX), primary open angle glaucoma (POAG), normal tension glaucoma (NTG), pigmentary glaucoma (PIGM), and ocular hypertension (OHTN).

<sup>1</sup> Adjusted for age at the first recorded spherical equivalent measure, sex and race/ethnicity.

<sup>2</sup> Indicates SE  $\leq -6.00$  D.

<sup>3</sup> Indicates SE of -5.99 to -3.00 D.

<sup>4</sup> Indicates SE of -2.99 to -1.00 D.

<sup>5</sup> Indicates SE of -0.99 to 1.00 D.

<sup>6</sup> Indicates SE of 1.01 to 3.00 D.

<sup>7</sup> Indicates SE  $\geq 3.01$  D.

<sup>8</sup> Estimates not provided for  $\leq -6.00$  for PCAG and  $\geq 3.01$  for PEX due to small numbers of subjects.
